# Supplementary material for: A polythreading array formed by a (3,5)-connected 3D anionic network and 1D cationic chains: synthesis, structure, and catalytic properties
Source: Royal Society of Chemistry journal article supplement (doi:10.1039/c3dt50641j), 2013-01-01
Supplement: c3dt50641j.pdf [file c3dt50641j.pdf]

# A polythreading array formed by a (3,5)-connected 3D anion network and 1D cation chains: synthesis, structure, and catalytic properties

Min Li,<sup>a</sup> Shan Zhao,<sup>a</sup> Yan-Fen Peng,<sup>a,b</sup> Bao-Long Li\*<sup>a</sup> and Hai-Yan Li<sup>a</sup>

<sup>a</sup>Key Laboratory of Organic Synthesis of Jiangsu Province, College of Chemistry, Chemical Engineering and Materials Science, Soochow University, Suzhou 215123, P.R.China. E-mail: [libaolong@suda.edu.cn](mailto:libaolong@suda.edu.cn)

<sup>b</sup>Department of Material and Chemical Engineering, Chizhou University, Chizhou, Anhui 247000, P. R. China

**Table S1** Hydrogen bondings for **1** (Å and °).

| D-H...A                          | d(D-H)    | d(H...A)  | D(D...A)  | <(DHA) |
|----------------------------------|-----------|-----------|-----------|--------|
| O(8)-H(1W)...O(7) <sup>i</sup>   | 0.893(18) | 1.970(19) | 2.862(3)  | 178(3) |
| O(8)-H(2W)...O(11)               | 0.881(18) | 1.88(2)   | 2.733(6)  | 162(3) |
| O(8)-H(2W)...O(12)               | 0.881(18) | 1.84(2)   | 2.713(10) | 171(3) |
| O(9)-H(3W)...O(4) <sup>ii</sup>  | 0.867(19) | 2.02(2)   | 2.877(4)  | 171(4) |
| O(9)-H(4W)...O(10)               | 0.885(18) | 1.919(19) | 2.803(4)  | 175(4) |
| O(10)-H(5W)...O(7) <sup>i</sup>  | 0.893(19) | 1.90(2)   | 2.793(4)  | 174(4) |
| O(10)-H(6W)...O(7) <sup>ii</sup> | 0.880(19) | 2.28(2)   | 3.123(4)  | 161(4) |

Symmetry transformations used to generate equivalent atoms: i x+1, y, z; ii -x+1, -y+1, -z+1.

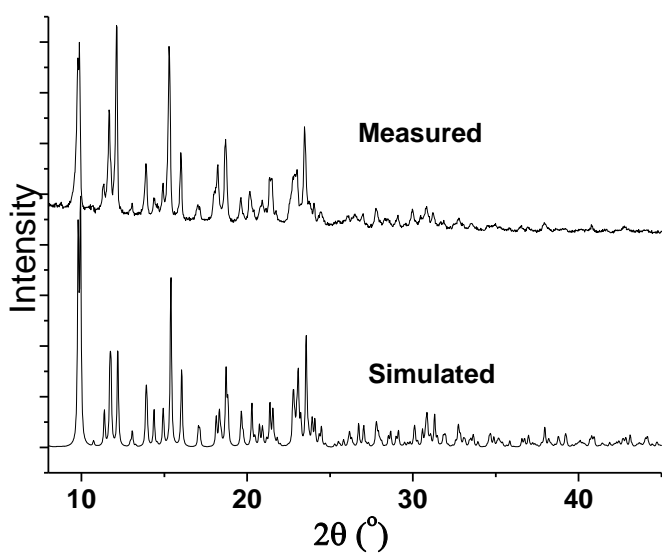

**Fig. S1** The measured and simulated XPRD of compound 1.

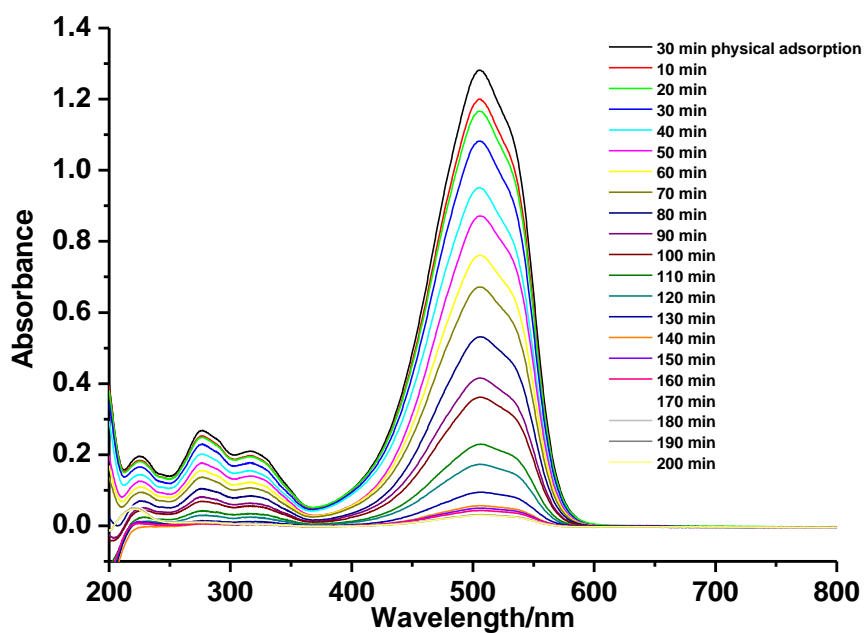

**Fig. S2** Changes in UV-visible absorption spectra of MO solution in the presence of compound 1.

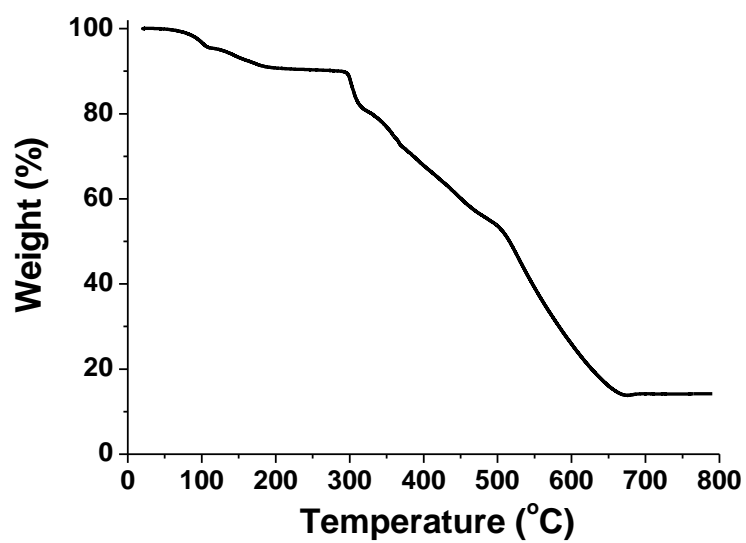

**Fig. S3** The TG curve of compound **1**.
